# Supplementary material for: Additive Interaction Between Systemic Inflammation and Functional Dependency on In-Hospital Mortality: A "Double-Hit" Phenotype in 8,409 Geriatric Inpatients
Source: Research Square preprint supplement (doi:10.21203/rs.3.rs-8599033/v1), 2026-02-17
Supplement: Supplementary file 1 [file 34a7afa84e0c535354a1b5d7.docx]

| Item | STROBE Item Description | Compliance | Explanation/Suggestion |
| --- | --- | --- | --- |
| Title and abstract |  |  |  |
| 1 | (a) Indicate the study's design with a commonly used term in the title or abstract. (b) Provide in the abstract an informative and balanced summary of what was done and what was found. | Yes | (a) Title specifies "retrospective cohort study". (b) Structured abstract covers background, methods, results, conclusion. |
| Introduction |  |  |  |
| 2 | Background/rationale: Explain the scientific background and why the study was done. | Yes | Introduction discusses inflammaging, CAR, BI prognosis, interaction gaps, secondary geriatric hospital evidence. |
| 3 | Objectives: Clearly state the aim(s) of the study. Primary and, when applicable, secondary objective(s) should be specific. | Yes | Explicit aims: joint/interactive effects of CAR/BI on mortality, focus on additive interaction and "double-hit" phenotype. |
| Methods |  |  |  |
| 4 | Study design: Present key elements of study design early in the paper. | Yes | 2.1: Retrospective cohort, timeframe (2022.1-2025.12), ethics, inclusion/exclusion. |
| 5 | Setting: Describe the setting, locations, and relevant dates, including periods of recruitment, exposure, follow-up, and data collection. | Yes | Shanghai Pudong New Area Geriatric Hospital (secondary geriatric), 8,409 ≥65yo patients. |
| 6 | Participants (a) Cohort study—Give the eligibility criteria, and the sources and methods of selection of participants. Describe methods of follow-up. (b) For matched studies, give matching criteria and number of exposed and unexposed. | Yes | 2.1: Detailed exclusions (stay <24h, missing data); follow-up = in-hospital mortality. |
| 7 | Variables: Clearly define all outcomes, exposures, predictors, potential confounders, and effect modifiers. Give diagnostic criteria, if applicable. | Yes | 2.2: CAR=CRP/Albumin; BI standard; covariates (age, sex, CCI, etc.). 2.3: MICE for missing data. |
| 8 | Data sources/measurement: For each variable of interest, give sources of data and details of methods of assessment (measurement). Describe comparability of assessment methods if there is more than one group. | Yes | 2.2: CRP/Albumin within 24h admission; BI within 24h; covariates specified. |
| 9 | Bias: Describe any efforts to address potential sources of bias. | Partial | No explicit bias discussion (e.g., retrospective bias), but sensitivity analyses (Supplemental) mitigate. |
| 10 | Study size: Explain how the study size was arrived at. | Partial | Retrospective cohort from real-world hospital database (all ≥65yo inpatients, 2022-2025); n=8,409 after explicit exclusions (~13% mortality provides >99% post-hoc power for main effects, e.g., OR 1.35). Natural large sample justifies adequacy (common in retrospective designs). No prospective power calc (N/A). |
| 11 | Quantitative variables: Explain how quantitative variables were handled in the analyses. If applicable, describe which groupings were chosen and why. | Yes | CAR/BI continuous then dichotomized (ROC cutoffs); covariates categorized clearly. |
| 12 | Statistical methods (a) Describe all statistical methods, including those used to control for confounding. (b) Describe any methods used to examine subgroups and interactions. (c) Specify the statistical package(s), versions and procedures applied to generate confidence intervals. | Yes | 2.3: Logistic/Poisson regression, RERI/AP/SI, RCS; interactions (multiplicative/additive); Python 3.9, MICE. |
| Results |  |  |  |
| 13 | Participants: (a) Report numbers of individuals at each stage of study—e.g., numbers potentially eligible, examined for eligibility, confirmed eligible, included in the study, completing follow-up, and analysed. (b) Give reasons for non-participation at each stage. (c) Consider use of a flow diagram. | Yes | Table 1 baseline; 3.1 survivor/non-survivor; flow in Supplemental. |
| 14 | Descriptive data: (a) Give characteristics of study participants (e.g., demographic, clinical, social) and information on exposures and potential confounders. (b) Indicate number of participants with missing data for each variable of interest. (c) Cohort study—Summarise follow-up time (e.g., average and total amount). | Yes | Table 1: Survivor/non-survivor comparisons (age, CAR, BI, etc.). |
| 15 | Outcome data: Cohort study—Report numbers of outcome events or summary measures over time. | Yes | Table 6: 4-group RRs; Table 7: stratified. |
| 16 | Main results: (a) Give unadjusted estimates and, if applicable, confounder-adjusted estimates and their precision (e.g., 95% confidence interval). Make clear which confounders were adjusted for and why they were included. (b) Report category boundaries when continuous variables were categorized. (c) If relevant, consider translating estimates of relative risk into absolute risk for a meaningful time period. | Yes | OR/RR/RERI/AP/SI with 95%CIs (Tables 2,4,6); AUC 0.890. |
| 17 | Other analyses: Describe all additional analyses (e.g., sensitivity or subgroup analyses, interactions). | Yes | 3.5: Multiplicative/additive; RCS (Fig 2); stratified (Table 5,7); incremental (Table 3). |
| Discussion |  |  |  |
| 18 | Key results: Summarise key results with reference to study objectives. | Yes | 4.1-4.6: Double-hit, mechanisms, implications; compares Veronese/Zuo. |
| 19 | Limitations: Discuss limitations of the study, taking into account sources of potential bias or imprecision. Discuss both direction and magnitude of any potential bias. | Yes | 4.6: Single-center retrospective, competing risks, missing mediators (detailed 6 points). |
| 20 | Interpretation: Give a cautious overall interpretation of results considering objectives, limitations, multiplicity of analyses, results from similar studies, and other relevant evidence. | Yes | 4.3: Stratification framework; 4.5: Prior studies; 5: Clinical tool. |
| Other information |  |  |  |
| 21 | Generalisability: Discuss the generalisability (external validity) of the study results. | Yes | Introduction/Discussion: Secondary care focus; compares meta/cohorts. |
| 22 | Funding: Give the source of funding and the role of the funders for the present study and, if applicable, for the original study on which the present article is based. | Yes | Funding: Pudong project; no conflicts. |
| Introduction |  |  |  |
